# Supplementary material
Source: PubMed Central journal article supplement (PMC6583612)
Supplement: jamainternmed-e184357-s001.pdf [file jamainternmed-e184357-s001.pdf]

## Supplementary Online Content

Baudry J, Assmann KE, Touvier M, et al. Association of frequency of organic food consumption with cancer risk: findings from the NutriNet-Santé prospective cohort study. *JAMA Intern Med*. Published online October 22, 2018. doi:10.1001/jamainternmed.2018.4357

**eTable 1.** PNNS-GS: Components and Scores According to PNNS Recommendations

**eTable 2.** Baseline Characteristics Among Included and Excluded Participants, NutriNet-Santé Cohort, France

**eTable 3.** Parameter Estimates and Hazard Ratios (HR) with 95% Confidence Intervals (95% CI) for All Variables Included in the Main Model, NutriNet-Santé Cohort, France

**eTable 4.** Factor Loadings of the Two First PCA-Extracted Factors, NutriNet-Santé Cohort, France

**eTable 5.** Multivariable Associations Between the Organic Food Score (Modeled as a Continuous Variable and as Quartiles) and Overall Cancer Risk, Additional Models, NutriNet-Santé Cohort, France, 2009 to 2016

**eTable 6.** Parameter Estimates and Hazard Ratios (HR) with 95% Confidence Intervals (95% CI) for a 'Tandem' Variable Combining Both Different Diet Quality Levels (Reflected by the mPNNS-GS) and Organic Food Consumption Frequencies, NutriNet-Santé Cohort, France

**eTable 7.** Dietary Characteristics of Participants According to Quartiles of the Organic Food Score, NutriNet-Santé Cohort, France

**eAppendix.** Cancer Risk Modeling

**eReference.**

This supplementary material has been provided by the authors to give readers additional information about their work.

**eTable 1.** PNNS-GS: Components and Scores According to PNNS Recommendations

|                                               | Recommendation                                        | Scoring criteria                                                    | Score |
|-----------------------------------------------|-------------------------------------------------------|---------------------------------------------------------------------|-------|
| <b>1.Fruits and vegetables</b>                | At least 5/d                                          | [0-3.5[                                                             | 0     |
|                                               |                                                       | [3.5-5[                                                             | 0.5   |
|                                               |                                                       | [5-7.5[                                                             | 1     |
|                                               |                                                       | ≥7.5                                                                | 2     |
| <b>2.Bread, cereals, potatoes and legumes</b> | At each meal according to appetite                    | [0-1[                                                               | 0     |
|                                               |                                                       | [1-3[                                                               | 0.5   |
|                                               |                                                       | [3-6[                                                               | 1     |
|                                               |                                                       | ≥6                                                                  | 0.5   |
| <b>3. Whole grain food</b>                    | Choose whole grains and whole-grain breads more often | [0-1/3[                                                             | 0     |
|                                               |                                                       | [1/3-2/3[                                                           | 0.5   |
|                                               |                                                       | ≥2/3                                                                | 1     |
| <b>4.Milk and dairy products</b>              | 3/d (≥55-years-old: 3 to 4/d)                         | [0-1[                                                               | 0     |
|                                               |                                                       | [1-2.5[                                                             | 0.5   |
|                                               |                                                       | [2.5-3.5] (≥55-years-old: [2.5-4.5])                                | 1     |
|                                               |                                                       | >3.5 (55-years-old: >4.5)                                           | 0     |
| <b>5.Meat, poultry seafood and eggs</b>       | 1 to 2/d                                              | 0                                                                   | 0     |
|                                               |                                                       | ]0-1[                                                               | 0.5   |
|                                               |                                                       | [1-2]                                                               | 1     |
|                                               |                                                       | >2                                                                  | 0.5   |
| <b>6.Seafood</b>                              | At least 2/week                                       | <2/week                                                             | 0     |
|                                               |                                                       | ≥2/week                                                             | 1     |
| <b>7.Added fat</b>                            | Limit consumption                                     | Lipids from added fat>16% energy intake/d                           | 0     |
|                                               |                                                       | Lipids from added fat≤16% energy intake/d                           | 1     |
| <b>8. Vegetable added fat</b>                 | Favor fat of vegetable origin                         | No use of vegetable oil or ratio vegetable oil/total added fats≤0.5 | 0     |
|                                               |                                                       | No use of added fats or ratio vegetable oil/total added fats >0.5   | 1     |
| <b>9.Sweetened foods</b>                      | Limit consumption                                     | Added sugar from sweetened foods                                    | -0.5  |

|                                    |                                                                      |                                                             |      |
|------------------------------------|----------------------------------------------------------------------|-------------------------------------------------------------|------|
|                                    |                                                                      | ≥17.5% energy intake/d                                      |      |
|                                    |                                                                      | Added sugar from sweetened foods 17.5-12.5% energy intake/d | 0    |
|                                    |                                                                      | Added sugar from sweetened foods <12.5% energy intake/d     | 1    |
| <b>Beverages</b>                   |                                                                      |                                                             |      |
| <b>10. Non-alcoholic beverages</b> | Drink water as desired                                               | <1l water and >250 ml soda/d                                | 0    |
|                                    | Limit sweetened beverages: no more than 1 glass/d                    | ≥1l water and >250 ml soda/d                                | 0.5  |
|                                    |                                                                      | <1l water and ≤250 ml soda/d                                | 0.75 |
|                                    |                                                                      | ≥1l water and ≤250 ml soda/d                                | 1    |
| <b>11. Alcohol</b>                 | Women advised to drink ≤2 glasses of wine/d and ≤3 glasses/d for men | Ethanol >20 g/d for women and >30g/d for men                | 0    |
|                                    |                                                                      | Ethanol ≤20 g/d for women and ≤30g/d for men                | 0.8  |
|                                    |                                                                      | Abstainers and irregular consumers (<once a week)           | 1    |
| <b>12. Salt</b>                    | Limit consumption                                                    | >12g/d                                                      | -0.5 |
|                                    |                                                                      | ]10-12]g/d                                                  | 0    |
|                                    |                                                                      | ]8-10]g/d                                                   | 0.5  |
|                                    |                                                                      | ]6-8]g/d                                                    | 1    |
|                                    |                                                                      | ≤6 g/d                                                      | 1.5  |
| <b>13. Physical activity</b>       | At least the equivalent of 30 min/d of brisk walking                 | [0-30[ min/d                                                | 0    |
|                                    |                                                                      | [30-60[ min/d                                               | 1    |
|                                    |                                                                      | ≥60 min/d                                                   | 1.5  |

Abbreviations: mPNNS-GS, modified Programme National Nutrition Santé-Guideline Score ; PNNS, Programme National Nutrition Santé

**eTable 2.** Baseline Characteristics Among Included and Excluded Participants, NutriNet-Santé Cohort, France<sup>a</sup>

|                                              | Included      | Excluded         | P <sup>b</sup> |
|----------------------------------------------|---------------|------------------|----------------|
| <b>Organic food score (0-32)</b>             | 8.87 (7.36)   | 8.53 (7.39)      | <0.0001        |
| <b>Age (years)</b>                           | 44.23 (14.49) | 43.39<br>(14.60) | <0.0001        |
| <b>Female (%)</b>                            | 78.0          | 77.1             | <0.0001        |
| <b>Education level (%)</b>                   |               |                  | <0.0001        |
| Primary                                      | 0.7           | 0.6              |                |
| Secondary                                    | 18.2          | 23.7             |                |
| Undergraduate                                | 16.6          | 18.6             |                |
| Postgraduate                                 | 64.5          | 57.1             |                |
| <b>Occupational status (%)</b>               |               |                  | <0.0001        |
| Unemployed                                   | 5.9           | 7.0              |                |
| Student                                      | 7.7           | 9.4              |                |
| Self-employed, farmer                        | 1.9           | 2.6              |                |
| Employee, manual worker                      | 19.3          | 21.8             |                |
| Intermediate professions                     | 17.6          | 15.7             |                |
| Managerial staff, intellectual profession    | 23.6          | 21.2             |                |
| Retired                                      | 18.4          | 15.9             |                |
| Never employed                               | 5.7           | 6.4              |                |
| <b>Monthly income per household unit (%)</b> |               |                  | <0.0001        |
| < 1,200€                                     | 16.2          | 20.8             |                |
| 1,200-1,800€                                 | 24.6          | 25.3             |                |

|                                                          |                  |                     |         |
|----------------------------------------------------------|------------------|---------------------|---------|
| > 1,800-2,700€                                           | 23.7             | 21.2                |         |
| > 2,700€                                                 | 24.2             | 20.0                |         |
| Unwilling to answer                                      | 11.2             | 12.7                |         |
| <b>Cohabiting (%)</b>                                    | 81.8             | 80.0                | <0.0001 |
| <b>Body mass index (kg/m<sup>2</sup>)</b>                | 23.73 (4.49)     | 24.45<br>(5.16)     | <0.0001 |
| <b>Baseline use of dietary supplement (%)</b>            | 45.4             | 31.3                | <0.0001 |
| <b>Energy intake (kcal/d)<sup>c</sup></b>                | 1912.87 (495.00) | 1874.28<br>(519.96) | <0.0001 |
| <b>mPNNS-GS (/13.5)</b>                                  | 7.81 (1.73)      | 7.38 (1.67)         | <0.0001 |
| <b>Smoking status (%)</b>                                |                  |                     | <0.0001 |
| Never smoker                                             | 50.9             | 47.7                |         |
| Former smoker                                            | 33.7             | 32.2                |         |
| Current smoker                                           | 15.4             | 20.1                |         |
| <b>Physical activity (%)</b>                             |                  |                     | 0.025   |
| Low                                                      | 28.7             | 28.6                |         |
| Moderate                                                 | 37.6             | 34.4                |         |
| High                                                     | 20.3             | 20.7                |         |
| Missing data                                             | 13.4             | 16.3                |         |
| <b>Postmenopausal status (%)<sup>d</sup></b>             | 20.8             | 19.3                | <0.0001 |
| Use of hormonal treatment for menopause (%) <sup>d</sup> | 4.6              | 3.8                 | 0.01    |
| Use of oral contraception (%) <sup>d</sup>               | 20.2             | 19.6                | <0.0001 |

Abbreviations: mPNNS-GS, modified Programme National Nutrition Santé-Guideline Score

<sup>a</sup>Values are means (SD) or % as appropriate

<sup>b</sup>P-value based on linear trend for continuous variables or Mantel-Haenszel chi-square test for categorical variables

<sup>c</sup>Energy intake without alcohol

<sup>d</sup>Among women

**eTable 3.** Parameter Estimates and Hazard Ratios (HR) with 95% Confidence Intervals (95% CI) for All Variables Included in the Main Model, NutriNet-Santé Cohort, France

| Variable                                              | Coding                                          | Parameter estimate | HR       | Lower CI | Upper CI |
|-------------------------------------------------------|-------------------------------------------------|--------------------|----------|----------|----------|
| Organic food score<br>(ref=Q1)                        | Q2                                              | -0.06277           | 0.939    | 0.810    | 1.088    |
|                                                       | Q3                                              | -0.08157           | 0.922    | 0.793    | 1.071    |
|                                                       | Q4                                              | -0.2926            | 0.746    | 0.632    | 0.882    |
|                                                       | Sex (ref=Female)                                | Male               | -0.43015 | 0.650    | 0.496    |
| Occupational status<br>(ref=Self-employed,<br>farmer) | Unemployed                                      | 0.01231            | 1.012    | 0.601    | 1.706    |
|                                                       | Student                                         | -0.12301           | 0.884    | 0.368    | 2.125    |
|                                                       | Employee,<br>manual worker                      | 0.11235            | 1.119    | 0.702    | 1.785    |
|                                                       | Intermediate<br>professions                     | 0.23246            | 1.262    | 0.794    | 2.006    |
|                                                       | Managerial<br>staff, intellectual<br>profession | 0.02602            | 1.026    | 0.646    | 1.631    |
|                                                       | Retired                                         | 0.48144            | 1.618    | 1.012    | 2.588    |

|                                                             |                      |          |       |       |       |
|-------------------------------------------------------------|----------------------|----------|-------|-------|-------|
|                                                             | Never employed       | 0.16101  | 1.175 | 0.715 | 1.930 |
| Education level (ref= Post-secondary graduate)              |                      |          |       |       |       |
|                                                             | Unidentified         | -0.09839 | 0.906 | 0.469 | 1.752 |
|                                                             | <High school diploma | 0.00102  | 1.001 | 0.868 | 1.155 |
|                                                             | High school diploma  | 0.075    | 1.078 | 0.921 | 1.155 |
| Marital status (ref=Single)                                 | Cohabiting           | -0.08531 | 0.918 | 0.742 | 1.137 |
| Monthly income per household unit (ref=Unwilling to answer) |                      |          |       |       |       |
|                                                             | < 1,200€             | 0.04262  | 1.044 | 0.815 | 1.336 |
|                                                             | 1,200-1,800€         | -0.03457 | 0.966 | 0.781 | 1.195 |
|                                                             | > 1,800-2,700€       | 0.01629  | 1.016 | 0.826 | 1.251 |
|                                                             | > 2,700€             | 0.06034  | 1.062 | 0.864 | 1.306 |
| Physical activity (ref=Low)                                 |                      |          |       |       |       |
|                                                             | Moderate             | -0.02769 | 0.973 | 0.832 | 1.137 |
|                                                             | High                 | -0.07358 | 0.929 | 0.791 | 1.091 |
|                                                             | Missing data         | -0.10322 | 0.902 | 0.739 | 1.102 |



|                                                        |                                |           |       |       |       |
|--------------------------------------------------------|--------------------------------|-----------|-------|-------|-------|
| Smoking status<br>(ref=Never smoker)                   |                                |           |       |       |       |
|                                                        | Former smoker                  | 0.12268   | 1.131 | 1.004 | 1.273 |
|                                                        | Current smoker                 | 0.07954   | 1.083 | 0.901 | 1.301 |
| Alcohol intake (g/d)                                   |                                | 0.00511   | 1.005 | 1.001 | 1.009 |
| Family history of<br>cancer (ref=Yes)                  | No family<br>history of cancer | -0.24121  | 0.786 | 0.703 | 0.878 |
| Body mass index<br>(kg/m <sup>2</sup> )                |                                | 0.01067   | 1.011 | 0.998 | 1.024 |
| Height (cm)                                            |                                | 0.01477   | 1.015 | 1.006 | 1.024 |
| Energy intake (kcal/d)                                 |                                | 0.0000127 | 1     | 1     | 1     |
| mPNNs-GS (/13.5)                                       |                                | 0.00511   | 1.005 | 1.001 | 1.009 |
| Fiber intake (g/d)                                     |                                | -0.00548  | 0.995 | 0.984 | 1.005 |
| Processed meat intake<br>(g/d)                         |                                | -0.00147  | 0.999 | 0.996 | 1.001 |
| Red meat intake (g/d)                                  |                                | 0.0004484 | 1     | 0.999 | 1.002 |
| Parity (ref=0)                                         |                                |           |       |       |       |
|                                                        | 1 child                        | -0.0756   | 0.927 | 0.735 | 1.169 |
|                                                        | 2 children                     | -0.02871  | 0.972 | 0.789 | 1.197 |
|                                                        | >2 children                    | -0.1705   | 0.843 | 0.671 | 1.060 |
| Postmenopausal status<br>(ref=No)                      |                                | -0.30295  | 0.739 | 0.609 | 0.896 |
| Use of hormonal<br>treatment for<br>menopause (ref=No) |                                | 0.16575   | 1.180 | 0.963 | 1.446 |

|                                  |     |         |       |       |       |
|----------------------------------|-----|---------|-------|-------|-------|
| Use of contraception<br>(ref=No) | Yes | 0.08115 | 1.085 | 0.867 | 1.356 |
|----------------------------------|-----|---------|-------|-------|-------|

**eTable 4.** Factor Loadings of the Two First PCA-Extracted Factors, NutriNet-Santé Cohort, France<sup>a</sup>

|                                                  | Factor 1 | Factor 2 |
|--------------------------------------------------|----------|----------|
| <b>Food group</b>                                |          |          |
| Vegetables                                       | 0.59     | 0.27     |
| Fruit                                            | 0.49     | 0.14     |
| Wholegrain bread                                 | 0.39     | 0.06     |
| Nuts                                             | 0.39     | 0.11     |
| Water and non-sweet beverages (excluding juices) | 0.31     | 0.18     |
| Dried fruits                                     | 0.31     | 0.08     |
| Vegetable oils                                   | 0.20     | 0.32     |
| Sweet products                                   | 0.01     | 0.38     |
| Potatoes                                         | -0.08    | 0.36     |
| Butter                                           | -0.14    | 0.39     |
| Alcoholic beverages                              | -0.18    | 0.38     |
| Cheese                                           | -0.19    | 0.41     |
| Bread, rusks                                     | -0.30    | 0.48     |
| Processed meat                                   | -0.32    | 0.28     |

Abbreviation: PCA, principal component analysis

<sup>a</sup>Only food groups with a factor loading  $>|0.3|$  for at least one of the two factors are displayed in the table

**eTable 5.** Multivariable Associations Between the Organic Food Score (Modeled as a Continuous Variable and as Quartiles) and Overall Cancer Risk, Additional Models, NutriNet-Santé Cohort, France, 2009 to 2016

|                             | Q1        | Q2                  | Q3                  | Q4                  | P-trend <sup>a</sup> | HR for a 5-point increase | P       |
|-----------------------------|-----------|---------------------|---------------------|---------------------|----------------------|---------------------------|---------|
| Cases/non-cases             | 360/16471 | 358/17286           | 353/16887           | 269/16962           |                      |                           |         |
| Suppl. model 4 <sup>b</sup> | 1 (ref)   | 0.94<br>(0.81-1.09) | 0.92<br>(0.79-1.07) | 0.74<br>(0.63-0.87) | 0.0005               | 0.92<br>(0.88-0.96)       | <0.0001 |
| Suppl. model 5 <sup>c</sup> | 1 (ref)   | 0.95<br>(0.82-1.10) | 0.93<br>(0.80-1.09) | 0.76<br>(0.64-0.89) | 0.002                | 0.92<br>(0.89-0.96)       | 0.0002  |
| Suppl. model 6 <sup>d</sup> | 1 (ref)   | 0.91<br>(0.75-1.11) | 0.89<br>(0.72-1.09) | 0.70<br>(0.56-0.88) | 0.004                | 0.91<br>(0.86-0.96)       | 0.001   |

Abbreviations: HR, hazard ratio; mPNNS-GS, Programme National Nutrition Santé Guideline

Score without the physical activity component; Q, quartile

<sup>a</sup>P-value for linear trend obtained from the quartile classification by modeling organic food score quartiles as an ordinal variable

<sup>b</sup>Suppl. model 4 is adjusted for age (time-scale) and sex, occupational status, education, marital status, monthly income, physical activity, smoking status, alcohol consumption, family history of cancer, month of inclusion, body mass index, height, energy intake, mPNNS-GS and for women, parity, menopausal status, hormonal replacement treatment and oral contraception

<sup>c</sup>Suppl. model 5 is Suppl. model 4 + further adjustments for fiber, processed meat and meat consumption and ultra-processed food

<sup>d</sup>Suppl. model 6 is Suppl. model 4 + further adjustments for fiber, processed meat and meat consumption, with cases occurring during the first two-years of follow-up removed (numbers of cases across quartiles were: 204, 195, 187, 136)

**eTable 6.** Parameter Estimates and Hazard Ratios (HR) with 95% Confidence Intervals (95% CI) for a ‘Tandem’ Variable Combining Both Different Diet Quality Levels (Reflected by the mPNNS-GS) and Organic Food Consumption Frequencies, NutriNet-Santé Cohort, France

| ‘Tandem’ variable <sup>a</sup>                                                             | Parameter estimate | HR   | Lower CI | Upper CI |
|--------------------------------------------------------------------------------------------|--------------------|------|----------|----------|
| High organic food score + <b>high</b> mPNNS-GS vs. low organic food score + low mPNNS-GS   | -0.27              | 0.78 | 0.58     | 1.01     |
| High organic food score + <b>medium</b> mPNNS-GS vs. low organic food score + low mPNNS-GS | -0.34              | 0.71 | 0.53     | 0.95     |
| High organic food score + <b>low</b> mPNNS-GS vs. low organic food score + low mPNNS-GS    | -0.46              | 0.63 | 0.45     | 0.88     |

Abbreviations: mPNNS-GS, modified Programme National Nutrition Santé-Guideline Score

<sup>a</sup>High organic food score: belonging to quartile 4 of the organic food score; low organic food score: belonging to quartile 1 of the organic food score; high mPNNS-GS: belonging to tertile 3 of the mPNNS-GS; medium mPNNS-GS: belonging to tertile 2 of the mPNNS-GS; low mPNNS-GS: belonging to tertile 1 of the mPNNS-GS

**eTable 7.** Dietary Characteristics of Participants According to Quartiles of the Organic Food Score, NutriNet-Santé Cohort, France<sup>a</sup>

|                                  | Quartiles of the Organic Food Score |                     |                     |                     | P <sup>b</sup> |
|----------------------------------|-------------------------------------|---------------------|---------------------|---------------------|----------------|
|                                  | Q1                                  | Q2                  | Q3                  | Q4                  |                |
| <b>N</b>                         | 16831                               | 17644               | 17240               | 17231               |                |
| <b>Organic food score (0-32)</b> | 0.72 (0.82)                         | 4.95 (1.41)         | 10.36 (1.69)        | 19.36 (4.28)        | <0.0001        |
| <b>Nutrient intakes</b>          |                                     |                     |                     |                     |                |
| % carbohydrates <sup>c</sup>     | 42.60 (6.90)                        | 42.97 (6.82)        | 43.10 (7.01)        | 43.53 (7.18)        | <0.0001        |
| % lipids <sup>c</sup>            | 39.29 (6.62)                        | 39.00 (6.47)        | 38.99 (6.60)        | 39.56 (6.78)        | 0.0004         |
| % proteins <sup>c</sup>          | 17.80 (3.97)                        | 17.72 (3.93)        | 17.58 (4.04)        | 16.60 (3.95)        | <0.0001        |
| MUFA (g/d)                       | 30.76 (11.21)                       | 30.28 (10.78)       | 30.35 (11.12)       | 31.35 (11.74)       | <0.0001        |
| PUFA (g/d)                       | 11.46 (5.37)                        | 11.28 (5.03)        | 11.44 (5.36)        | 12.48 (6.22)        | <0.0001        |
| SFA (g/d)                        | 34.54 (13.33)                       | 33.50 (12.66)       | 32.95 (12.83)       | 31.74 (12.56)       | <0.0001        |
| Animal proteins (g/d)            | 58.56 (19.90)                       | 56.47 (19.42)       | 54.33 (19.84)       | 46.79 (20.35)       | <0.0001        |
| Vegetable proteins (g/d)         | 23.69 (7.90)                        | 24.31 (7.87)        | 25.47 (8.57)        | 28.40 (10.52)       | <0.0001        |
| Alcohol (g/d)                    | 8.34 (13.84)                        | 8.18 (13.11)        | 8.17 (12.19)        | 7.54 (11.30)        | <0.0001        |
| Beta-carotene (g/d)              | 3057.31<br>(2479.4)                 | 3287.75<br>(2523.8) | 3544.41<br>(2657.4) | 4102.32<br>(3224.9) | <0.0001        |
| Calcium (mg/d)                   | 943.26<br>(319.41)                  | 939.26<br>(312.57)  | 941.71<br>(315.80)  | 916.81<br>(305.90)  | <0.0001        |
| Cholesterol (mg/d)               | 329.76<br>(146.68)                  | 319.67<br>(142.60)  | 313.47<br>(142.45)  | 289.95<br>(141.84)  | <0.0001        |
| Iron (mg/d)                      | 12.74 (4.69)                        | 13.05 (4.78)        | 13.64 (4.94)        | 14.97 (5.57)        | <0.0001        |
| Fibers (g/d)                     | 17.88 (6.55)                        | 18.87 (6.84)        | 20.05 (7.20)        | 22.60 (8.31)        | <0.0001        |

|                                          |                     |                     |                     |                     |         |
|------------------------------------------|---------------------|---------------------|---------------------|---------------------|---------|
| Sodium (mg/d)                            | 2764.38<br>(950.43) | 2722.91<br>(912.94) | 2701.14<br>(920.35) | 2624.57<br>(911.11) | <0.0001 |
| Folates (µg/d)                           | 312.09<br>(113.27)  | 324.22<br>(114.62)  | 337.50<br>(119.16)  | 361.93<br>(130.77)  | <0.0001 |
| Vitamin C (mg/d)                         | 110.62<br>(82.54)   | 117.15<br>(74.90)   | 121.75<br>(75.03)   | 126.34<br>(96.72)   | <0.0001 |
| Vitamin E (mg/d)                         | 11.46 (4.99)        | 11.44 (4.71)        | 11.58 (4.85)        | 12.55 (5.53)        | <0.0001 |
| <b>Main food group intakes<br/>(g/d)</b> |                     |                     |                     |                     |         |
| Vegetables                               | 196.94<br>(120.71)  | 213.20<br>(121.39)  | 228.70<br>(121.94)  | 255.95<br>(131.37)  | <0.0001 |
| Fruit                                    | 168.80<br>(147.33)  | 185.35<br>(150.51)  | 199.97<br>(154.83)  | 215.65<br>(158.03)  | <0.0001 |
| Vegetable oils                           | 7.97 (8.21)         | 8.25 (8.34)         | 8.62 (8.53)         | 10.49 (10.11)       | <0.0001 |
| Legumes                                  | 9.11 (22.54)        | 9.93 (23.16)        | 11.38 (25.09)       | 18.31 (33.89)       | <0.0001 |
| Nuts                                     | 1.55 (7.35)         | 1.90 (7.34)         | 3.16 (10.59)        | 6.69 (15.29)        | <0.0001 |
| Potatoes                                 | 47.26 (50.96)       | 44.26 (48.69)       | 44.12 (49.45)       | 44.05 (49.59)       | <0.0001 |
| Fish                                     | 28.16 (35.74)       | 30.41 (36.90)       | 31.91 (38.10)       | 31.45 (37.14)       | <0.0001 |
| Processed meat                           | 23.67 (29.40)       | 21.15 (27.12)       | 18.85 (24.92)       | 15.12 (22.49)       | <0.0001 |
| Meat                                     | 48.72 (44.51)       | 44.59 (41.44)       | 40.77 (40.67)       | 31.44 (36.81)       | <0.0001 |
| Poultry                                  | 26.50 (33.39)       | 25.92 (32.89)       | 24.69 (32.21)       | 20.08 (29.20)       | <0.0001 |
| Eggs                                     | 13.20 (20.99)       | 13.02 (20.36)       | 13.36 (20.66)       | 14.23 (21.21)       | <0.0001 |
| Milk                                     | 93.46<br>(126.66)   | 83.30<br>(119.36)   | 73.03<br>(114.51)   | 50.45 (94.82)       | <0.0001 |



Abbreviations: MUFA, monounsaturated fatty acids; PUFA, polyunsaturated fatty acids; SFA, saturated fatty acids

<sup>a</sup>Values are means (SD)

<sup>b</sup>P-value based on linear trend

<sup>c</sup>As % of energy intake (without alcohol)

## **eAppendix.** Cancer Risk Modeling

Data were analyzed by cancer sites with significant numbers of cases, namely breast, prostate, skin (melanoma and spinocellular carcinoma) and colorectal cancers. Lymphomas were also investigated as of relevance in relation to organic food consumption.

Participants contributed person-time until the date of cancer diagnosis, the date of the last completed questionnaire, the date of death, or November 30, 2016, whichever occurred first. For analysis by cancer site, other cases than the one of interest were censored at the diagnosis date. Thus, other cancer events were considered to be non-cases for the cancer studied and participants contributed person time until the date of diagnosis of their cancer. For breast cancer, supplemental analyses stratified by menopausal status were performed among women. Women contributed person-time to each model according to age at menopause.

Proportional hazards assumption was assessed graphically. A first model was adjusted for age (time-scale) and sex. A second model (main model) was further adjusted for month of inclusion, occupational status, educational level, marital status, monthly income, physical activity, smoking status, alcohol intake, family history of cancer, body mass index (BMI), height, energy intake without alcohol, mPNNS-GS, dietary fiber intake and consumption of meat and processed meat. For women, additional adjustments were performed for the number of biological children, menopausal status at baseline, hormonal treatment for menopause at baseline and oral contraception use at baseline. **eTable 3** provides the parameter estimates and HR (95%CI) for all the independent variables entered into the main model.

Further adjustments for ultra-processed food, fruit and vegetable consumption, dietary supplement use and sun exposure were performed but did not substantially change the risk estimates (data not shown).

In order to consider potential residual confounding related to dietary patterns not captured by the mPNNS-GS, an additional model was adjusted for ultra-processed food consumption, fruit

and vegetable consumption, and western and healthy dietary patterns (model 3). To do so, we performed a principal component analysis (PCA) on 59 food groups. Dietary patterns extracted by PCA are independent linear combinations of the food group consumptions, maximizing the explained variance. For each participant, the individual pattern score was calculated by summing the intake of the 59 food groups, weighted by their factor loading. **eTable 4** provides the loadings of the two first PCA-extracted factors.

Additional models (Suppl. models 4 and 5) with different types of adjustments were also performed. Analyses were also performed after excluding cancer cases diagnosed during the two first years of individual follow-up to restrict potential reverse causality bias (Suppl. model 6) (**eTable 5**).

In addition, to examine the combined effects of various diet quality levels and high frequency of organic food consumption on cancer risk, we created a ‘tandem’ variable based on both quartiles of the organic food score and tertiles of the mPNNS-GS, consisting of 12 modalities. Each modality represented a particular combination of the two aforementioned scores. For instance, a high-quality diet and high frequency of organic food consumption (defined as belonging to both Q4 of the organic food score and tertile 3 of the mPNNS-GS) was modality 1 while low-quality diet and low frequency of organic food consumption (defined as belonging to both Q1 of the organic food score and tertile 1 of the mPNNS-GS) was modality 12. Analyses were performed using model 2 covariates (reference=belonging to Q1 of the organic food score and tertile 1 of the mPNNS-GS) (**eTable 6**).

Additionally, as the different food categories included in the organic food score represent different exposure levels to residual pesticides (plant products are more likely to contain pesticide residues than animal products)<sup>1</sup>, a simplified score relying on the main plant-based food groups (fruit; vegetables; flour; soy-based products; bread and cereals; grains and legumes) was also computed in a sensitivity analysis. The association between the simplified

organic food score and risk of cancer was examined using models adjusted for model 2 covariates.

To determine whether the associations varied according to major confounders, we also conducted tests for interactions. In addition, in order to identify vulnerable subgroups, we investigated the association between the organic food score (modeled as quartiles, Q4 vs. Q1, using model 2 covariates) and overall cancer risk stratified by the following factors: sex, age (using median-age as a cut-off), education level, family history of cancer, overall dietary quality, BMI and tobacco status.

## **eReference**

1. EFSA. The 2015 European Union Report on Pesticide Residues in Food. *EFSA Journal*, 11(3), 3130. 2017.
